# Supplementary material for: Association of dietary meat consumption habits with neurodegenerative cognitive impairment: an updated systematic review and dose–response meta-analysis of 24 prospective cohort studies
Source: Royal Society of Chemistry journal article supplement (doi:10.1039/d2fo03168j), 2022-01-01
Supplement: d2fo03168j1.pdf [file d2fo03168j1.pdf]

**Association of dietary meat consumption habits with neurodegenerative  
cognitive impairment: an updated systematic review and dose-response meta-  
analysis of 24 prospective cohort studies**

Wei Quan<sup>\*, a</sup>, Yang Xu<sup>a</sup>, Jie Luo<sup>a</sup>, Maomao Zeng<sup>b</sup>, Zhiyong He<sup>b</sup>, Qingwu Shen<sup>a</sup>, Jie  
Chen<sup>\*, b, c</sup>

**Online Supplementary Material**

**CONTENTS:**

**Supplementary Method.** Detailed STATA commands and examples regarding the two-stage generalized least squares trend (GLST) program, the establishment of cubic spline models, the increment analysis and final dose-response meta-analysis.

**Supplementary Table 1.** PRISMA Checklist for this systematic review and meta-analysis.

**Supplementary Table 2.** MOOSE Checklist for this systematic review and meta-analysis.

**Supplemental Table 3** Detailed search strategy in the three databases PubMed, Embase and MEDLINE.

**Supplementary Table 4** References and score range of diagnosis criteria of outcomes used in the included studies.

**Supplementary Table 5** References for FFQs used in the included studies.

**Supplementary Table 6.** Quality assessment of all included studies.

**Supplementary Table 7.** Data extracted for dose-response analysis.

**Supplementary Figure 1.** Funnel plots of total meat intakes and neurodegenerative cognitive disorders risk in the highest *versus* lowest analysis.

**Supplementary Figure 2.** Funnel plots of red meat intakes and neurodegenerative cognitive disorders risk in the highest *versus* lowest analysis.

**Supplementary Figure 3.** Funnel plots of fish intakes and neurodegenerative cognitive disorders risk in the highest *versus* lowest analysis.

**Supplementary Figure 4.** Funnel plots of poultry intakes and neurodegenerative cognitive disorders risk in the highest *versus* lowest analysis.

**Supplementary Figure 5.** Subgroup analysis (stratified by different types of adverse cognitive outcome) for total meat intakes and risk of neurodegenerative cognitive disorders.

**Supplementary Figure 6.** Subgroup analysis (stratified by processing method of meat, location and quality score of studies) for total meat intakes and risk of neurodegenerative cognitive disorders.

**Supplementary Figure 7.** Subgroup analysis (stratified by different types of adverse cognitive outcome) for red meat intakes and risk of neurodegenerative cognitive disorders.

**Supplementary Figure 8.** Subgroup analysis (stratified by processing method of meat, location and quality score of studies) for red meat intakes and risk of neurodegenerative cognitive disorders.

**Supplementary Figure 9.** Subgroup analysis (stratified by different types of adverse cognitive outcome) for fish intakes and risk of neurodegenerative cognitive disorders.

**Supplementary Figure 10.** Subgroup analysis (stratified by processing method of meat, location and quality score of studies) for fish intakes and risk of neurodegenerative cognitive disorders.

**Supplementary Method.**

[STATA commands]

(1) GLST program

```
. gen double se=(logciu-logcil)/(2*invnormal(.975))  
/*calculate the standard error (se)*/  
/*logciu, natural logarithm of the upper limit of confidence interval (CI); logcil,  
natural logarithm of the lower limit of CI*/  
. glst logrr dose, se(se) cov(n cases) [cc|ir|ci]  
/*generate the GLS equation and provide a correct estimate of the linear trend; cc  
specifies case-control data; ir specifies incidence-rate data; ci specifies cumulative  
incidence data*/  
/*logrr, natural logarithm of dependent variable; dose, independent variable; n,  
number of participants; cases, number of outcome cases*/
```

(2) Establishment of cubic spline models

```
. gen se=(logciu-logcil)/(2*invnorm(0.975))  
. glst logrr dose, se(se) cov(personyr case) pfirst(id type) ts(r) eform  
. capture drop doses*  
. _pctile dose, percentile(5 35 65 95)  
. ret list  
. mkspline doses=dose, knots(`=r(r1)' `=r(r2)' `=r(r3)' `=r(r4)') cubic displayknots  
. glst logrr doses*, se(se) cov(personyr case) pfirst(id type)  
. testparm doses2 doses3  
. glst logrr dose, se(se) cov(personyr case) pfirst(id type) ts(r)  
. predictnl lrr_lin=_b[dose]*dose  
. gen rr_lin=exp(lrr_lin)  
. glst logrr doses*, se(se) cov(personyr case) pfirst(id type)  
. predictnl logrrwithref = _b[doses1]*doses1 + _b[doses2]*doses2 +  
_b[doses3]*doses3, ci(lo hi)  
. gen rrwithref = exp(logrrwithref)  
. gen lbwithref = exp(lo)
```

```
. gen ubwithref = exp(hi)
```

```
. sort doses1
```

(3) Increment analysis

```
. lincom dose*dose0, eform
```

```
/*calculate the relative risk (RR) and 95% CI based on the above GLS equation when  
the independent variable equals dose0*/
```

(4) Meta-analysis

```
. metan rr cil ciu, label(namevar=author, yearvar=year) by(appendix) wgt(weight)
```

```
nooverall
```

```
/*perform the meta-analysis after the increment analysis of each included study is  
completed*/
```

```
/*rr, RR; cil, lower limit of CI; ciu, upper limit of CI; author, surname of first author;  
year, publication year; appendix, subgroup variables; weight, weighed by random  
effects model (inverse variance heterogeneity)*/
```

**Supplementary Table 1. PRISMA Checklist for this systematic review and meta-analysis**

| Section and Topic             | Item # | Checklist item                                                                                                                                                                                                                                                                                       | Location where item is reported |
|-------------------------------|--------|------------------------------------------------------------------------------------------------------------------------------------------------------------------------------------------------------------------------------------------------------------------------------------------------------|---------------------------------|
| <b>TITLE</b>                  |        |                                                                                                                                                                                                                                                                                                      |                                 |
| Title                         | 1      | Identify the report as a systematic review.                                                                                                                                                                                                                                                          | 1                               |
| <b>ABSTRACT</b>               |        |                                                                                                                                                                                                                                                                                                      |                                 |
| Abstract                      | 2      | See the PRISMA 2020 for Abstracts checklist.                                                                                                                                                                                                                                                         | 2                               |
| <b>INTRODUCTION</b>           |        |                                                                                                                                                                                                                                                                                                      |                                 |
| Rationale                     | 3      | Describe the rationale for the review in the context of existing knowledge.                                                                                                                                                                                                                          | 3                               |
| Objectives                    | 4      | Provide an explicit statement of the objective(s) or question(s) the review addresses.                                                                                                                                                                                                               | 3                               |
| <b>METHODS</b>                |        |                                                                                                                                                                                                                                                                                                      |                                 |
| Eligibility criteria          | 5      | Specify the inclusion and exclusion criteria for the review and how studies were grouped for the syntheses.                                                                                                                                                                                          | 5, 6                            |
| Information sources           | 6      | Specify all databases, registers, websites, organisations, reference lists and other sources searched or consulted to identify studies. Specify the date when each source was last searched or consulted.                                                                                            | 5                               |
| Search strategy               | 7      | Present the full search strategies for all databases, registers and websites, including any filters and limits used.                                                                                                                                                                                 | 5                               |
| Selection process             | 8      | Specify the methods used to decide whether a study met the inclusion criteria of the review, including how many reviewers screened each record and each report retrieved, whether they worked independently, and if applicable, details of automation tools used in the process.                     | 5                               |
| Data collection process       | 9      | Specify the methods used to collect data from reports, including how many reviewers collected data from each report, whether they worked independently, any processes for obtaining or confirming data from study investigators, and if applicable, details of automation tools used in the process. | 5, 6                            |
| Data items                    | 10a    | List and define all outcomes for which data were sought. Specify whether all results that were compatible with each outcome domain in each study were sought (e.g. for all measures, time points, analyses), and if not, the methods used to decide which results to collect.                        | 5, 6                            |
|                               | 10b    | List and define all other variables for which data were sought (e.g. participant and intervention characteristics, funding sources). Describe any assumptions made about any missing or unclear information.                                                                                         | 5, 6                            |
| Study risk of bias assessment | 11     | Specify the methods used to assess risk of bias in the included studies, including details of the tool(s) used, how many reviewers assessed each study and whether they worked independently, and if applicable, details of automation tools used in the process.                                    | 6, 7                            |
| Effect measures               | 12     | Specify for each outcome the effect measure(s) (e.g. risk ratio, mean difference) used in the synthesis or presentation of results.                                                                                                                                                                  | 6, 7                            |
| Synthesis methods             | 13a    | Describe the processes used to decide which studies were eligible for each synthesis (e.g. tabulating the study intervention characteristics and comparing against the planned groups for each synthesis (item #5)).                                                                                 | 6, 7                            |
|                               | 13b    | Describe any methods required to prepare the data for presentation or synthesis, such as handling of missing summary statistics, or data conversions.                                                                                                                                                | 6, 7                            |
|                               | 13c    | Describe any methods used to tabulate or visually display results of individual studies and syntheses.                                                                                                                                                                                               | 6, 7                            |

| Section and Topic             | Item # | Checklist item                                                                                                                                                                                                                                                                       | Location where item is reported |
|-------------------------------|--------|--------------------------------------------------------------------------------------------------------------------------------------------------------------------------------------------------------------------------------------------------------------------------------------|---------------------------------|
|                               | 13d    | Describe any methods used to synthesize results and provide a rationale for the choice(s). If meta-analysis was performed, describe the model(s), method(s) to identify the presence and extent of statistical heterogeneity, and software package(s) used.                          | 6, 7                            |
|                               | 13e    | Describe any methods used to explore possible causes of heterogeneity among study results (e.g. subgroup analysis, meta-regression).                                                                                                                                                 | 6, 7                            |
|                               | 13f    | Describe any sensitivity analyses conducted to assess robustness of the synthesized results.                                                                                                                                                                                         | 6, 7                            |
| Reporting bias assessment     | 14     | Describe any methods used to assess risk of bias due to missing results in a synthesis (arising from reporting biases).                                                                                                                                                              | 7                               |
| Certainty assessment          | 15     | Describe any methods used to assess certainty (or confidence) in the body of evidence for an outcome.                                                                                                                                                                                | 7                               |
| <b>RESULTS</b>                |        |                                                                                                                                                                                                                                                                                      |                                 |
| Study selection               | 16a    | Describe the results of the search and selection process, from the number of records identified in the search to the number of studies included in the review, ideally using a flow diagram.                                                                                         | 7                               |
|                               | 16b    | Cite studies that might appear to meet the inclusion criteria, but which were excluded, and explain why they were excluded.                                                                                                                                                          | 7                               |
| Study characteristics         | 17     | Cite each included study and present its characteristics.                                                                                                                                                                                                                            | 7, 8                            |
| Risk of bias in studies       | 18     | Present assessments of risk of bias for each included study.                                                                                                                                                                                                                         | 10                              |
| Results of individual studies | 19     | For all outcomes, present, for each study: (a) summary statistics for each group (where appropriate) and (b) an effect estimate and its precision (e.g. confidence/credible interval), ideally using structured tables or plots.                                                     | 8                               |
| Results of syntheses          | 20a    | For each synthesis, briefly summarise the characteristics and risk of bias among contributing studies.                                                                                                                                                                               | 8-10                            |
|                               | 20b    | Present results of all statistical syntheses conducted. If meta-analysis was done, present for each the summary estimate and its precision (e.g. confidence/credible interval) and measures of statistical heterogeneity. If comparing groups, describe the direction of the effect. | 8-10                            |
|                               | 20c    | Present results of all investigations of possible causes of heterogeneity among study results.                                                                                                                                                                                       | 8-10                            |
|                               | 20d    | Present results of all sensitivity analyses conducted to assess the robustness of the synthesized results.                                                                                                                                                                           | 8-10                            |
| Reporting biases              | 21     | Present assessments of risk of bias due to missing results (arising from reporting biases) for each synthesis assessed.                                                                                                                                                              | 10                              |
| Certainty of evidence         | 22     | Present assessments of certainty (or confidence) in the body of evidence for each outcome assessed.                                                                                                                                                                                  | 10                              |
| <b>DISCUSSION</b>             |        |                                                                                                                                                                                                                                                                                      |                                 |
| Discussion                    | 23a    | Provide a general interpretation of the results in the context of other evidence.                                                                                                                                                                                                    | 12                              |

| Section and Topic                              | Item # | Checklist item                                                                                                                                                                                                                             | Location where item is reported |
|------------------------------------------------|--------|--------------------------------------------------------------------------------------------------------------------------------------------------------------------------------------------------------------------------------------------|---------------------------------|
|                                                | 23b    | Discuss any limitations of the evidence included in the review.                                                                                                                                                                            | 15, 16                          |
|                                                | 23c    | Discuss any limitations of the review processes used.                                                                                                                                                                                      | 15, 16                          |
|                                                | 23d    | Discuss implications of the results for practice, policy, and future research.                                                                                                                                                             | 15, 16                          |
| <b>OTHER INFORMATION</b>                       |        |                                                                                                                                                                                                                                            |                                 |
| Registration and protocol                      | 24a    | Provide registration information for the review, including register name and registration number, or state that the review was not registered.                                                                                             | 4                               |
|                                                | 24b    | Indicate where the review protocol can be accessed, or state that a protocol was not prepared.                                                                                                                                             | 4                               |
|                                                | 24c    | Describe and explain any amendments to information provided at registration or in the protocol.                                                                                                                                            | 4                               |
| Support                                        | 25     | Describe sources of financial or non-financial support for the review, and the role of the funders or sponsors in the review.                                                                                                              | 16                              |
| Competing interests                            | 26     | Declare any competing interests of review authors.                                                                                                                                                                                         | 17                              |
| Availability of data, code and other materials | 27     | Report which of the following are publicly available and where they can be found: template data collection forms; data extracted from included studies; data used for all analyses; analytic code; any other materials used in the review. | 17                              |

**Supplementary Table 2.** MOOSE Checklist for this systematic review and meta-analysis

| <b>Criteria</b>                                    |                                                                                                            | <b>Brief description of how the criteria were handled in the meta-analysis</b>                                                                                                                                                                                                                                                                          |
|----------------------------------------------------|------------------------------------------------------------------------------------------------------------|---------------------------------------------------------------------------------------------------------------------------------------------------------------------------------------------------------------------------------------------------------------------------------------------------------------------------------------------------------|
| <b>Reporting of background should include</b>      |                                                                                                            |                                                                                                                                                                                                                                                                                                                                                         |
| √                                                  | Problem definition                                                                                         | Accumulating epidemiological studies suggest that meat consumption is associated with risk of neurodegenerative cognitive disorders, but results remain inconsistent.                                                                                                                                                                                   |
| √                                                  | Hypothesis statement                                                                                       | Different types of meat related to the increased risk of neurodegenerative cognitive disorders                                                                                                                                                                                                                                                          |
| √                                                  | Description of study outcomes                                                                              | Neurodegenerative cognitive disorders                                                                                                                                                                                                                                                                                                                   |
| √                                                  | Type of exposure or intervention used                                                                      | Different types of meat, red meat, fish, poultry                                                                                                                                                                                                                                                                                                        |
| √                                                  | Type of study designs used                                                                                 | We included prospective cohort studies                                                                                                                                                                                                                                                                                                                  |
| √                                                  | Study population                                                                                           | People without neurodegenerative cognitive disorders                                                                                                                                                                                                                                                                                                    |
| <b>Reporting of search strategy should include</b> |                                                                                                            |                                                                                                                                                                                                                                                                                                                                                         |
| √                                                  | Qualifications of searchers                                                                                | The credentials of the two investigators WQ and YJ are indicated in the author list.                                                                                                                                                                                                                                                                    |
| √                                                  | Search strategy, including time period included in the synthesis and keywords                              | PubMed from 1990 – December 2021<br>EMBASE from 1990 – December 2021<br>MEDLINE 1990 – December 2021<br>Web of Knowledge 1990 – December 2021<br>The Cochrane Library 1990 – December 2021<br>Keywords See search strategy section in the article                                                                                                       |
| √                                                  | Databases and registries searched                                                                          | PubMed, Embase, MEDLINE, Web of Knowledge, and the Cochrane Library                                                                                                                                                                                                                                                                                     |
| √                                                  | Search software used, name and version, including special features                                         | We did not employ a search software. EndNote was used to merge retrieved citations and eliminate duplications                                                                                                                                                                                                                                           |
| √                                                  | Use of hand searching                                                                                      | We have hand-checked the reference lists of original publications and previous meta-analyses or reviews                                                                                                                                                                                                                                                 |
| √                                                  | List of citations located and those excluded, including justifications                                     | Details of the literature search process are outlined in the flow chart. The citation list is available upon request                                                                                                                                                                                                                                    |
| √                                                  | Method of addressing articles published in languages other than English                                    | We limited to studies published in the English language                                                                                                                                                                                                                                                                                                 |
| √                                                  | Method of handling abstracts and unpublished studies                                                       | Unpublished data, conference papers, editorials, theses, and patents were not included                                                                                                                                                                                                                                                                  |
| √                                                  | Description of any contact with authors                                                                    | We contacted corresponding authors of studies that did not reported sufficient data in an effort to complete our data set.                                                                                                                                                                                                                              |
| <b>Reporting of methods should include</b>         |                                                                                                            |                                                                                                                                                                                                                                                                                                                                                         |
| √                                                  | Description of relevance or appropriateness of studies assembled for assessing the hypothesis to be tested | Detailed inclusion and exclusion criteria were described in the methods section.                                                                                                                                                                                                                                                                        |
| √                                                  | Rationale for the selection and coding of data                                                             | Data extracted from each of the studies were relevant to the first author's name; year of publication; country; duration of follow-up; age range; number of participants and incident cases; diagnostic method and criteria of outcome; dietary assessment method; food items; multivariate-adjusted risk estimate; and confounding factors of interest |
| √                                                  | Assessment of confounding                                                                                  | Restricted the analysis to meat estimates only.                                                                                                                                                                                                                                                                                                         |
| √                                                  | Assessment of study quality, including blinding of quality assessors; stratification or                    | The Newcastle–Ottawa Scale (NOS) adapted for cohort studies was used by two investigators (Ye Jiao and Wei Quan) to assess the quality of the included articles.                                                                                                                                                                                        |



|                                                |                                                                          |                                                                                                                                                                                                                                                                                  |
|------------------------------------------------|--------------------------------------------------------------------------|----------------------------------------------------------------------------------------------------------------------------------------------------------------------------------------------------------------------------------------------------------------------------------|
|                                                | regression on possible predictors of study results                       |                                                                                                                                                                                                                                                                                  |
| √                                              | Assessment of heterogeneity                                              | Heterogeneity of the studies were explored within two types of study designs using Cochrane's Q test of heterogeneity and $I^2$ statistic that provides the relative amount of variance of the summary effect due to the between-study heterogeneity.                            |
| √                                              | Description of statistical methods in sufficient detail to be replicated | Description of methods of meta-analyses, sensitivity analyses, subgroup analysis and assessment of publication bias are detailed in the methods.                                                                                                                                 |
| √                                              | Provision of appropriate tables and graphics                             | We included 1 flow chart, 1 summary table, 1 table of subgroup analysis, 4 forest plot of all studies, 1 table of sensitivity analyses.                                                                                                                                          |
| <b>Reporting of results should include</b>     |                                                                          |                                                                                                                                                                                                                                                                                  |
| √                                              | Graph summarizing individual study estimates and overall estimate        | Figure 1                                                                                                                                                                                                                                                                         |
| √                                              | Table giving descriptive information for each study included             | Table 1                                                                                                                                                                                                                                                                          |
| √                                              | Results of sensitivity testing                                           | Supplementary Table 1                                                                                                                                                                                                                                                            |
| √                                              | Indication of statistical uncertainty of findings                        | 95% confidence intervals were presented with all summary estimates, $I^2$ values and results of sensitivity analyses                                                                                                                                                             |
| <b>Reporting of discussion should include</b>  |                                                                          |                                                                                                                                                                                                                                                                                  |
| √                                              | Quantitative assessment of bias                                          | Sensitivity analyses indicate heterogeneity in strengths of the association due to most common biases in observational studies.                                                                                                                                                  |
| √                                              | Justification for exclusion                                              | We excluded studies that had not reported for the meat consumption as exposure                                                                                                                                                                                                   |
| √                                              | Assessment of quality of included studies                                | We discussed the results of the sensitivity analyses, and potential reasons for the observed heterogeneity.                                                                                                                                                                      |
| <b>Reporting of conclusions should include</b> |                                                                          |                                                                                                                                                                                                                                                                                  |
| √                                              | Consideration of alternative explanations for observed results           | We discussed that potential unmeasured confounders such as Maillard reaction harmful products may related to the risk of cognitive disorders.                                                                                                                                    |
| √                                              | Generalization of the conclusions                                        | A high consumption of total meat (especially for processed total meat and red meat) is associated with increased risk of neurodegenerative cognitive disorders. While higher fish and poultry intakes is associated with decreased risk of neurodegenerative cognitive disorders |
| √                                              | Guidelines for future research                                           | We recommend to exploring the potential mechanisms of processed meat products or their harmful products and the risk of cognitive impairment in the future.                                                                                                                      |
| √                                              | Disclosure of funding source                                             | This work has been supported by the National Natural Science Foundation of China (Grant No. 3217160166), The Innovation and Exploration Fund of State Key Laboratory of Food Science and Technology, Jiangnan University (No. SKLF-ZZA-202001).                                  |

**Supplemental Table 3** Detailed search strategy in the three databases PubMed, Embase and MEDLINE

| <b>PubMed</b>  |    |                                                                                                                                                                                                                                                                                                                                                                                                                                                                                                                                                                        |
|----------------|----|------------------------------------------------------------------------------------------------------------------------------------------------------------------------------------------------------------------------------------------------------------------------------------------------------------------------------------------------------------------------------------------------------------------------------------------------------------------------------------------------------------------------------------------------------------------------|
|                | #1 | Diet [mh] OR food [mh] OR meat [mh] OR prok meats [mh] OR pig meat [mh] OR bacon [mh] OR cured ham [mh] OR ham [mh] OR meat products [tiab] OR red meat [tiab] OR meat, red [tiab] OR beef [tiab] OR lamb meat [tiab] OR lamb [tiab] OR veal [tiab] OR poultry [tiab] OR chickens [tiab] OR ducks [tiab] OR geese [tiab] OR turkeys [tiab] OR poultry meat [tiab] OR poultry products [tiab] OR animals [tiab] OR seafood [tiab] OR fish [tiab] OR shellfish [tiab] OR fish products [tiab] OR fish flour [tiab] OR shellfish protein [tiab] OR poultry protein [tiab] |
|                | #2 | "Cognitive Dysfunction" [mh] OR Dementia [mh] OR "Parkinsonian Disorders" [mh] OR cognitive [tiab] OR cognition [tiab] OR dementia [tiab] OR dementias [tiab] OR "intellectual impairment" [tiab] OR "intellectual disability" [tiab] OR "intellectual dysfunction" [tiab] OR alzheimer [tiab] OR alzheimers [tiab] OR alzheimer's [tiab] OR parkinson [tiab] OR parkinsons [tiab] OR parkinson's [tiab] OR parkinsonism [tiab] OR "lewy body disease" [tiab] OR "frontotemporal lobar degeneration" [tiab] OR neurodegenerative [tiab] OR neurodegeneration [tiab]    |
|                | #3 | "Cohort Studies" [tiab] OR "Prospective Studies" [tiab] OR "Epidemiologic Studies" [tiab] OR "Studies, Prospective" [tiab]                                                                                                                                                                                                                                                                                                                                                                                                                                             |
|                | #4 | #1 AND #2 AND #3                                                                                                                                                                                                                                                                                                                                                                                                                                                                                                                                                       |
| <b>Embase</b>  |    |                                                                                                                                                                                                                                                                                                                                                                                                                                                                                                                                                                        |
|                | #1 | Diet/exp OR food/exp OR meat/exp OR prok meats/exp OR pig meat /exp OR bacon/exp OR cured ham/exp OR ham/exp OR meat products:ti,ab OR red meat:ti,ab OR meat, red:ti,ab OR beef:ti,ab OR lamb meat:ti,ab OR lamb:ti,ab OR veal:ti,ab OR poultry:ti,ab OR chickens:ti,ab OR ducks:ti,ab OR geese:ti,ab OR turkeys:ti,ab OR poultry meat:ti,ab OR poultry products:ti,ab OR animals:ti,ab OR seafood:ti,ab OR fish:ti,ab OR shellfish:ti,ab OR fish products:ti,ab OR fish flour:ti,ab OR shellfish protein:ti,ab OR poultry protein:ti,ab                              |
|                | #2 | 'cognitive defect'/exp OR cognition/exp OR 'intellectual impairment'/exp OR 'Alzheimer disease'/exp OR 'Parkinson disease'/exp OR cognitive:ti,ab OR cognition:ti,ab OR dementia:ti,ab OR dementias:ti,ab OR 'intellectual impairment':ti,ab OR 'intellectual disability':ti,ab OR 'intellectual dysfunction':ti,ab OR alzheimer:ti,ab OR alzheimers:ti,ab OR parkinson:ti,ab OR parkinsons:ti,ab OR parkinsonism:ti,ab OR 'lewy body disease':ti,ab OR 'frontotemporal lobar degeneration':ti,ab OR neurodegenerative:ti,ab OR neurodegeneration:ti,ab                |
|                | #3 | 'Cohort Studies'/exp OR 'Prospective Studies'/exp OR 'Epidemiologic Studies':ti,ab OR 'Studies, Prospective':ti,ab                                                                                                                                                                                                                                                                                                                                                                                                                                                     |
|                | #4 | #1 AND #2 AND #3                                                                                                                                                                                                                                                                                                                                                                                                                                                                                                                                                       |
| <b>MEDLINE</b> |    |                                                                                                                                                                                                                                                                                                                                                                                                                                                                                                                                                                        |
|                | #1 | Diet [mh] OR food [mh] OR meat [mh] OR prok meats [mh] OR                                                                                                                                                                                                                                                                                                                                                                                                                                                                                                              |

|  |    |                                                                                                                                                                                                                                                                                                                                                                                                                                                                                                                                                                                       |
|--|----|---------------------------------------------------------------------------------------------------------------------------------------------------------------------------------------------------------------------------------------------------------------------------------------------------------------------------------------------------------------------------------------------------------------------------------------------------------------------------------------------------------------------------------------------------------------------------------------|
|  |    | pig meat [mh] OR bacon [mh] OR cured ham [mh] OR ham [mh] OR meat products [tiab] OR red meat [tiab] OR meat, red [tiab] OR beef [tiab] OR lamb meat [tiab] OR lamb [tiab] OR veal [tiab] OR poultry [tiab] OR chickens [tiab] OR ducks [tiab] OR geese [tiab] OR turkeys [tiab] OR poultry meat [tiab] OR poultry products [tiab] OR animals [tiab] OR seafood [tiab] OR fish [tiab] OR shellfish [tiab] OR fish products [tiab] OR fish flour [tiab] OR shellfish protein [tiab] OR poultry protein [tiab]                                                                          |
|  | #2 | [mh "Cognitive Dysfunction"] OR [mh Dementia] OR [mh "Parkinsonian Disorders"] OR (cognitive):ti,ab OR (cognition):ti,ab OR (dementia):ti,ab OR (dementias):ti,ab OR ("intellectual impairment"):ti,ab OR ("intellectual disability"):ti,ab OR ("intellectual dysfunction"):ti,ab OR (alzheimer):ti,ab OR (alzheimers):ti,ab OR (alzheimer's):ti,ab OR (parkinson):ti,ab OR (parkinsons):ti,ab OR (parkinson's):ti,ab OR (parkinsonism):ti,ab OR ("lewy body disease"):ti,ab OR ("frontotemporal lobar degeneration"):ti,ab OR (neurodegenerative):ti,ab OR (neurodegeneration):ti,ab |
|  | #3 | "Cohort Studies" [tiab] OR "Prospective Studies" [tiab] OR "Epidemiologic Studies" [tiab] OR "Studies, Prospective " [tiab]                                                                                                                                                                                                                                                                                                                                                                                                                                                           |
|  | #4 | #1 AND #2 AND #3                                                                                                                                                                                                                                                                                                                                                                                                                                                                                                                                                                      |

**Supplementary Table 4** References and score range of diagnosis criteria of outcomes used in the included studies

| Author (year)           | Diagnosis criteria of outcome | Score range and reference for cognitive assessment                                                                                                                                                                                                                                                                                                                                                                                                                                                                                                                                                                                                                                                                                                                     |
|-------------------------|-------------------------------|------------------------------------------------------------------------------------------------------------------------------------------------------------------------------------------------------------------------------------------------------------------------------------------------------------------------------------------------------------------------------------------------------------------------------------------------------------------------------------------------------------------------------------------------------------------------------------------------------------------------------------------------------------------------------------------------------------------------------------------------------------------------|
| Anastasiou (2017)       | DSM-IV;<br>NINCDS/ADRDA       | <b>Ref:</b> 1. American Psychiatric Association. Diagnostic and Statistical Manual of Mental Disorders. 4th ed ed. Washington, DC2000.<br>2. McKhann G, Drachman D, Folstein M, Katzman R, Price D, Stadlan EM. Clinical diagnosis of Alzheimer's disease: report of the NINCDS-ADRDA Work Group under the auspices of Department of Health and Human Services Task Force on Alzheimer's Disease. Neurology. 1984; 34(7):939–44.                                                                                                                                                                                                                                                                                                                                       |
| Ashby-Mitchell (2014)   | MMSE                          | <b>Score range:</b> cognitively impaired (score of 0–23) or not cognitively impaired (score of 24–30)<br><b>Ref:</b> Anstey, K.J.; von Sanden, C.; Luszcz, M.A. An 8-year prospective study of the relationship between cognitive performance and falling in very old adults. J. Am. Geriatr. Soc. 2006, 54, 1169–1176.                                                                                                                                                                                                                                                                                                                                                                                                                                                |
| Roberts (2010)          | DSM-IV                        | <b>Ref:</b> American Psychiatric Association: Diagnostic and Statistical Manual of Mental Disorders, ed 4. Washington, American Psychiatric Association, 1994.                                                                                                                                                                                                                                                                                                                                                                                                                                                                                                                                                                                                         |
| Tanaka (2018)           | MMSE                          | <b>Score range:</b> No dementia (MMSE score > 26), dementia (MMSE score ≤ 26)<br><b>Ref:</b> Folstein, M.F.; Folstein, S.E.; McHugh, P.R. "Mini-mental state". A practical method for grading the cognitive state of patients for the clinician. J. Psychiatr. Res. 1975, 12, 189–198.                                                                                                                                                                                                                                                                                                                                                                                                                                                                                 |
| Barberger-Gateau (2002) | DSM-IIIIR                     | <b>Ref:</b> American Psychiatric Association. Diagnostic and statistical manual of mental disorders, 4th ed. Washington, DC: APA Press, 1994.                                                                                                                                                                                                                                                                                                                                                                                                                                                                                                                                                                                                                          |
| Barberger-Gateau (2007) | DSM-IIIIR                     | <b>Ref:</b> American Psychiatric Association. Diagnostic and statistical manual of mental disorders, 4th ed. Washington, DC: APA Press, 1994.                                                                                                                                                                                                                                                                                                                                                                                                                                                                                                                                                                                                                          |
| Chen (2012)             | MMSE-r                        | <b>Score range:</b> Normal cognitive (MMSE-r score > 18), cognitive decline (MMSE-r score ≤ 18)<br><b>Ref:</b> 1. Gu D DM, authors; Zeng Y, Poston DL, Vlosk Da, gu D, editors. assessment of reliability of mortality and morbidity in the 1998-2002 CLHLS waves. healthy longevity in China: Demographic, socioeconomic, and psychological dimensions. Dordrecht, The netherlands: Springer Publisher. 2008:p. 99–115.<br>2. Zeng Y VJ, Xiao Z, Zhang C, Liu Y,. The healthy longevity survey and the active life expectancy of the oldest old in China. Population. an english Selection 2001. p. 95–116.<br>3. Zhang Z. gender differentials in cognitive impairment and decline of the oldest old in China. J gerontol B Psychol Sci Soc Sci. 2006;61(2):S107-15. |
| Fischer (2018)          | DSM- IV; NINCDS-ADRDA         | <b>Score range:</b> scoring 0–55 with a higher score indicating a better performance<br><b>Ref:</b> 1. McKhann, G.; Drachman, D.; Folstein, M.; Katzman, R.; Price, D.; Stadlanet, E.M. Clinical diagnosis of Alzheimer's disease: Report of the NINCDS-ADRDA Work Group under the auspices of Department of Health and Human Services Task Force on Alzheimer's Disease. Neurology 1984, 34, 939–944.<br>2. Román, G.C.; Tatemichi, T.K.; Masdeu, J.C.; Garcia, J.H.; Amaducci, L.; Orgogozo, J.M.; Brun, A.; Hofman, A. Vascular dementia: Diagnostic criteria for research studies. Report of the NINDS-AIREN International Workshop. Neurology 1993, 43, 250–260.                                                                                                  |

Supplementary Table 4 Continued

| Author (year)       | Diagnosis criteria of outcome | Reference for cognitive assessment                                                                                                                                                                                                                                                                                                                                                                                                                                                                                                                                                                                                                                                                                                             |
|---------------------|-------------------------------|------------------------------------------------------------------------------------------------------------------------------------------------------------------------------------------------------------------------------------------------------------------------------------------------------------------------------------------------------------------------------------------------------------------------------------------------------------------------------------------------------------------------------------------------------------------------------------------------------------------------------------------------------------------------------------------------------------------------------------------------|
| Vercambre (2009)    | OCDS                          | <p><b>Score range:</b> cognitive decline (DECO score &lt; 33); cognitive troubles (non-null 4-IADL score)</p> <p><b>Ref:</b> 1. Ritchie K &amp; Fuhrer R (1996) The validation of an informant screening test for irreversible cognitive decline in the elderly: performance characteristics within a general population sample. <i>Int J Geriatr Psychiatry</i> 11, 149–156.<br/> 2. Barberger-Gateau P, Fabrigoule C, Helmer C, et al. (1999) Functional impairment in instrumental activities of daily living: an early clinical sign of dementia? <i>J Am Geriatr Soc</i> 47, 456–462.</p>                                                                                                                                                 |
| Rahman (2007)       | MSQ                           | <p><b>Score range:</b> No dementia (MSQ score &gt; 28), dementia (MSQ score ≤ 28)</p> <p><b>Ref:</b> no reference</p>                                                                                                                                                                                                                                                                                                                                                                                                                                                                                                                                                                                                                          |
| Katsiardanis (2013) | MMSE                          | <p><b>Score range:</b> No dementia (MMSE score &gt; 24), cognitive impairment (MMSE score ≤ 24)</p> <p><b>Ref:</b> Fountoulakis K, Tsolaki M, Chantzi H, Kazis A: Mini-Mental State Examination (MMSE): a validation study in Greece. <i>Am J Alzheimer's Dis Other Dement</i> 2000;15:342–345.</p>                                                                                                                                                                                                                                                                                                                                                                                                                                            |
| Ritchie (2010)      | SICT                          | <p><b>Ref:</b> Artero S, Petersen R, Touchon J, Ritchie K. Revised criteria for mild cognitive impairment: validation within a longitudinal population study. <i>Dement Geriatr Cogn Disord</i> 2006;22:465-70</p>                                                                                                                                                                                                                                                                                                                                                                                                                                                                                                                             |
| Chuang (2019)       | MMSE ICD-9                    | <p><b>Score range:</b> No dementia (MMSE score &gt; 25), cognitive impairment (MMSE score ≤ 25); dementia codes (ICD-9-CM: 331.0 and 290.0-290.4)</p> <p><b>Ref:</b> 1. Pfeiffer E. A short portable mental status questionnaire for the assessment of organic brain deficit in elderly patients. <i>J Am Geriatr Soc</i> 1975;23: 433e441.<br/> 2. Folstein MF, Folstein SE, McHugh PR. “Mini-mental state”. A practical method for grading the cognitive state of patients for the clinician. <i>J Psychiatr Res</i> 1975; 12:189e198.<br/> 3. Katzman R, Zhang MY, Ouang YQ, et al. A Chinese version of the Mini-Mental State Examination: Impact of illiteracy in a Shanghai dementia survey. <i>J Clin Epidemiol</i> 1988;41:971e978</p> |
| Trichopoulou (2015) | MMSE                          | <p><b>Score range:</b> mild performance decline (change in MMSE -4 to -1), substantial performance decline (change in MMSE ≤ -5)</p> <p><b>Ref:</b> 1. Folstein MF, Folstein SE, McHugh PR (1975) “Mini-mental state”. A practical method for grading the cognitive state of patients for the clinician. <i>J Psychiatr Res</i> 12(3):189–198.<br/> 2. Fountoulakis KN, Tsolaki M, Chantzi H, Kazis A (2000) Mini mental state examination (MMSE): a validation study in Greece. <i>Am J Alzheimers Dis Other Dement</i> 15(6):342–345.</p>                                                                                                                                                                                                    |
| Albanese (2009)     | ICD-10                        | <p><b>Ref:</b> 1. Copeland JR, Dewey ME, Griffiths-Jones HM. A computerized psychiatric diagnostic system and case nomenclature for elderly subjects: GMS and AGE-CAT. <i>Psychol Med</i> 1986;16:89–99.<br/> 2. WHO. Clinical descriptions and diagnostic guidelines, MNH/MEP/87.1. In: WHO, ed. Tenth revision of the International Classification of Diseases. Geneva, Switzerland: WHO, 1987.</p>                                                                                                                                                                                                                                                                                                                                          |

Supplementary Table 4 Continued

| Author (year)    | Diagnosis criteria of outcome | Reference for cognitive assessment                                                                                                                                                                                                                                                                                                                                                                                                                                                                                                                                                                                                             |
|------------------|-------------------------------|------------------------------------------------------------------------------------------------------------------------------------------------------------------------------------------------------------------------------------------------------------------------------------------------------------------------------------------------------------------------------------------------------------------------------------------------------------------------------------------------------------------------------------------------------------------------------------------------------------------------------------------------|
| Wang (2010)      | MMSE                          | <p><b>Score range:</b> MCI (MMSE score 19-24), normal (MMSE score 25-30)</p> <p><b>Ref:</b> 1. Huang CQ, Dong BR, Wu HM, Zhang YL, Wu JH, Lu ZC, Flaherty JH: Association of cognitive impairment with serum lipid/lipoprotein among Chinese nonagenarians and centenarians. <i>Dementia and geriatric cognitive disorders</i> 2009, 27:111-116.</p> <p>2. Dufouil C, Clayton D, Brayne C, Chi LY, Denning TR, Paykel ES, O'Connor DW, Ahmed A, McGee MA, Huppert FA: Population norms for the MMSE in the very old: estimates based on longitudinal data. <i>Mini-Mental State Examination. Neurology</i> 2000, 55:1609-1613.</p>             |
| Ylilauri (2022)  | MMSE<br>ICD-10                | <p><b>Score range:</b> AD (ICD-10 codes F00 and G30)</p> <p><b>Ref:</b> 1. Ylilauri MPT, Voutilainen S, Lönnroos E, Mursu J, Virtanen HEK, Koskinen TT, Salonen JT, Tuomainen T, Virtanen JK (2017) Association of dietary cholesterol and egg intakes with the risk of incident dementia or Alzheimer disease: the Kuopio Ischaemic Heart Disease Risk Factor Study. <i>Am J Clin Nutr</i> 105:476–484.</p> <p>2. Koivisto K (1995) Population-based dementia screening program in the city of Kuopio, Eastern Finland: evaluation of screening methods, prevalence of dementia and dementia subtypes. Dissertation, University of Kuopio</p> |
| Franca (2018)    | MMSE                          | <p><b>Ref:</b> Bertolucci PHF, Brucki SMD, Campacci SR, Juliano Y. O Mini Exame do Estado Mental em uma população geral: impacto da escolaridade. <i>Arq. Neuropsiquiatr.</i> 1994; 52(1): 1–7.</p>                                                                                                                                                                                                                                                                                                                                                                                                                                            |
| Tsurumaki (2019) | LTCI                          | <p><b>Score range:</b> The Dementia Scale is classified into six ranks (0, I–IV and M), dementia-related behavioural disturbance (rank M), dementia (rank <math>\geq</math> II)</p> <p><b>Ref:</b> 1. Ikeda A, Yamagishi K, Tanigawa T, et al. (2008) Cigarette smoking and risk of disabling dementia in a Japanese rural community: a nested case-control study. <i>Cerebrovas Dis</i> 25, 324–331.</p> <p>2. Imahashi K, Kawagoe M, Eto F, et al. (2007) Clinical status and dependency of the elderly requiring long-term care in Japan. <i>Tohoku J Exp Med</i> 212, 229–238.</p>                                                         |
| Jiang (2018)     | MMSE                          | <p><b>Score range:</b> No dementia (MMSE score <math>&gt;24</math>), cognitive impairment (MMSE score <math>\leq 24</math>)</p> <p><b>Ref:</b> Feng L, Chong MS, Lim WS, Ng TP (2012) The Modified MiniMental State Examination test: normative data for Singapore Chinese older adults and its performance in detecting early cognitive impairment. <i>Singap Med J</i> 53(7):458–46.</p>                                                                                                                                                                                                                                                     |
| Zhang (2021)     | ICD-9<br>ICD-10               | <p><b>Score range:</b> AD (ICD-9 code 331.0 and ICD-10 codes F00 and G30); dementia (ICD-9 codes 290, 291.2, 294.1, 331.0–331.2, and 331.5, and ICD-10 codes A81.0, F02, F05.1, F10.6, G31.0, G31.1, and G31.8)</p> <p><b>Ref:</b> Power MC, Weuve J, Sharrett AR, Blacker D, Gottesman RF. Statins, cognition, and dementia—systematic review and methodological commentary. <i>Nat Rev Neurol</i> 2015;11:220–9.</p>                                                                                                                                                                                                                         |
| Ngabirano (2019) | DSM-IV;<br>NINCDS/ADRDA       | <p><b>Ref:</b> 1. American Psychiatric Association (1994) Diagnostic and statistical manual of mental disorders, 4th ed., APA Press, Washington, DC.</p> <p>2. McKhann G, Drachman D, Folstein M, Katzman R, Price D, Stadlan EM (1984) Clinical diagnosis of Alzheimer's disease: report of the NINCDS-ADRDA Work Group under the auspices of Department of Health and Human Services Task Force on Alzheimer's Disease. <i>Neurology</i> 34, 939-944.</p>                                                                                                                                                                                    |

**Supplementary Table 5** References for FFQs used in the included studies

| Author (year)           | Food frequency assessment                                | Reference for food frequency assessment                                                                                                                                                                                                                                                                           |
|-------------------------|----------------------------------------------------------|-------------------------------------------------------------------------------------------------------------------------------------------------------------------------------------------------------------------------------------------------------------------------------------------------------------------|
| Anastasiou (2017)       | Semi-quantitative food frequency questionnaire           | Bountziouka V, Bathrellou E, Giotopoulou A, Katsagoni C, Bonou M, Vallianou N, et al. Development, repeatability and validity regarding energy and macronutrient intake of a semi-quantitative food frequency questionnaire: methodological considerations. <i>Nutr Metab Cardiovasc Dis.</i> 2012; 22(8):659–67. |
| Ashby-Mitchell (2014)   | 121 items Semi-quantitative food frequency questionnaire | Grantham, N.M.; Magliano, D.J.; Hodge, A.; Jowett, J.; Meikle, P.; Shaw, J.E. The association between dairy food intake and the incidence of diabetes in Australia: The Australian diabetes obesity and lifestyle study (AusDiab). <i>Public Health Nutr.</i> 2013, 16, 339–345.                                  |
| Roberts (2010)          | 128 items Health Habits and History Questionnaire        | Block G, Coyle LM, Hartman AM, Scoppa SM: Revision of dietary analysis software for the Health Habits and History Questionnaire. <i>Am J Epidemiol</i> 1994;139:1190–1196.                                                                                                                                        |
| Tanaka (2018)           | food frequency questionnaire                             | Bartali, B.; Turrini, A.; Salvini, S.; Lauretani, F.; Russo, C.R.; Corsi, A.M.; Bandinelli, S.; D’Amicis, A.; Palli, D.; Guralnik, J.M.; et al. Dietary intake estimated using different methods in two Italian older populations. <i>Arch. Gerontol. Geriatr.</i> 2004, 38, 51–60.                               |
| Barberger-Gateau (2002) | food frequency questionnaire                             | Barberger Gateau P, Fabrigoule C, Helmer C, Rouch I, Dartigues JF. Functional impairment in instrumental activities of daily living: an early clinical sign of dementia? <i>J Am Geriatr Soc</i> 1999;47:456–62.                                                                                                  |
| Barberger-Gateau (2007) | food frequency questionnaire                             | Barberger Gateau P, Fabrigoule C, Helmer C, Rouch I, Dartigues JF. Functional impairment in instrumental activities of daily living: an early clinical sign of dementia? <i>J Am Geriatr Soc</i> 1999;47:456–62.                                                                                                  |
| Chen (2012)             | 8 items interviewer-administrated questionnaire          | Wang Z, Dong B, Zeng g, Li J, Wang W, Wang B, et al. Is there an association between Mild Cognitive Impairment and Dietary Pattern in Chinese elderly? Results from a Crosssectional Population Study. <i>BMC Public health.</i> 2010;10(1):595.                                                                  |
| Fischer (2018)          | 8-item “cognitive health” food intake screener           | Cooper, B.; Bickel, H.; Schaufele, M. The ability of general-practitioners to detect dementia and cognitive impairment in their elderly patients—A study in Mannheim. <i>Int. J. Geriatr. Psychiatry</i> 1992, 7, 591–598.                                                                                        |
| Vercambre (2009)        | dietary questionnaire                                    | van Liere MJ, Lucas F, Clavel F, et al. (1997) Relative validity and reproducibility of a French dietary history questionnaire. <i>Int J Epidemiol</i> 26, Suppl. 1, S128–S136.                                                                                                                                   |
| Rahman (2007)           | food frequency questionnaire                             | No references                                                                                                                                                                                                                                                                                                     |
| Katsiardanis (2013)     | 157 items Semi-quantitative food frequency questionnaire | Gnardellis C, Trichopoulou A, Katsouyanni K, Polychronopoulos E, Rimm EB, Trichopoulos D: Reproducibility and validity of an extensive semiquantitative food frequency questionnaire among Greek school teachers. <i>Epidemiology</i> 1995;6:74–77.                                                               |

Supplementary Table 5 Continued

| Author (year)       | Food frequency assessment                                | Reference for food frequency assessment                                                                                                                                                                                                                                                                                                                                                           |
|---------------------|----------------------------------------------------------|---------------------------------------------------------------------------------------------------------------------------------------------------------------------------------------------------------------------------------------------------------------------------------------------------------------------------------------------------------------------------------------------------|
| Ritchie (2010)      | food frequency questionnaire                             | Akbaraly TN, Portet F, Fustinoni S, Dartigues JF, Artero S, Rouaud O, et al. Leisure activities and the risk of dementia in the elderly: results from the Three-City Study. <i>Neurology</i> 2009;73:854-61.                                                                                                                                                                                      |
| Chuang (2019)       | 79-item food-frequency questionnaire                     | Pan WH, Lee MM, Yu SL, Huang PC. Foods predictive of nutrient intake in Chinese diet in Taiwan: II. Vitamin A, vitamin B1, vitamin B2, vitamin C and calcium. <i>Int J Epidemiol</i> 1992;21:929e934.<br>Lee MM, Pan WH, Yu SL, Huang PC. Foods predictive of nutrient intake in Chinese diet in Taiwan: I. Total calories, protein, fat and fatty acids. <i>Int J Epidemiol</i> 1992;21:922e928. |
| Trichopoulou (2015) | 150 items Semi-quantitative food frequency questionnaire | Katsouyanni K, Rimm EB, Gnardellis C, Trichopoulos D, Polychronopoulos E, Trichopoulou A (1997) Reproducibility and relative validity of an extensive semi-quantitative food frequency questionnaire using dietary records and biochemical markers among Greek schoolteachers. <i>Int J Epidemiol</i> 26(Suppl 1):S118–S127.                                                                      |
| Albanese (2009)     | food frequency questionnaire                             | Prince M, Ferri CP, Acosta D, et al. The protocols for the 10/66 dementia research group population-based research programme. <i>BMC Public Health</i> 2007;7:165                                                                                                                                                                                                                                 |
| Wang (2010)         | food frequency questionnaire                             | Huang CQ, Dong BR, Wu HM, Zhang YL, Wu JH, Lu ZC, Flaherty JH: Association of cognitive impairment with serum lipid/lipoprotein among Chinese nonagenarians and centenarians. <i>Dementia and geriatric cognitive disorders</i> 2009, 27:111-116                                                                                                                                                  |
| Ylilauri (2022)     | food recording of 4 days                                 | Willet W (2013) Implications of total energy intake for epidemiologic analyses. In: Willet W (ed) <i>Nutritional epidemiology. Monographs in epidemiology and biostatistics</i> , 3rd edn. Oxford University Press, Oxford, pp 260–286                                                                                                                                                            |
| Franca (2018)       | food frequency questionnaire                             | World Health Organization. Diet, nutrition and the prevention of chronic diseases. Report of a Joint WHO/FAO Expert Consultation. WHO Technical Report Series 916. Geneva. 2003                                                                                                                                                                                                                   |
| Tsurumaki (2019)    | 39 items Semi-quantitative food frequency questionnaire  | Ogawa K, Tsubono Y, Nishino Y, et al. (2003) Validation of a food-frequency questionnaire for cohort studies in rural Japan. <i>Public Health Nutr</i> 6, 147–157.                                                                                                                                                                                                                                |
| Jiang (2018)        | 150 items Semi-quantitative food frequency questionnaire | Talaei M, Wang YL, Yuan JM, Pan A, Koh WP (2017) Meat, dietary heme iron, and risk of type 2 diabetes mellitus: the Singapore Chinese Health Study. <i>Am J Epidemiol</i> 186(7):824–833.                                                                                                                                                                                                         |
| Zhang (2021)        | 47 items Semi-quantitative food frequency questionnaire  | Bradbury KE, Young HJ, Guo W, Key TJ. Dietary assessment in UK Biobank: an evaluation of the performance of the touchscreen dietary questionnaire. <i>J Nutr Sci</i> 2018;7:e6.                                                                                                                                                                                                                   |
| Ngabirano (2019)    | food frequency questionnaire                             | Larrieu S, Letenneur L, Berr C, Dartigues JF, Ritchie K, Alperovitch A, Tavernier B, BarbergerGateau P (2004) Sociodemographic differences in dietary habits in a population-based sample of elderly subjects: the 3C study. <i>J Nutr Health Aging</i> 8, 497-502.                                                                                                                               |



**Supplementary Table 6** Quality assessment of the publications included in the meta-analysis

| Author, (year)          | Selection<br>(0-4)      |                       |                        |                       | Comparability<br>(0-2)    |                    | Outcome<br>(0-3)   |                | Overall quality |
|-------------------------|-------------------------|-----------------------|------------------------|-----------------------|---------------------------|--------------------|--------------------|----------------|-----------------|
|                         | Representative of cases | Selection of controls | Exposure ascertainment | No history of outcome | Comparable on confounders | Outcome assessment | Adequate follow-up | Follow-up rate |                 |
| Anastasiou (2017)       | 0                       | 1                     | 1                      | 1                     | 1                         | 1                  | 0                  | 0              | 5               |
| Ashby-Mitchell (2014)   | 0                       | 1                     | 1                      | 1                     | 1                         | 1                  | 1                  | 0              | 4               |
| Roberts (2010)          | 0                       | 1                     | 1                      | 0                     | 1                         | 1                  | 1                  | 0              | 5               |
| Tanaka (2018)           | 1                       | 1                     | 1                      | 1                     | 2                         | 1                  | 1                  | 0              | 8               |
| Barberger-Gateau (2002) | 1                       | 0                     | 1                      | 1                     | 0                         | 1                  | 0                  | 0              | 4               |
| Barberger-Gateau (2007) | 1                       | 1                     | 1                      | 1                     | 1                         | 1                  | 1                  | 0              | 7               |
| Chen (2012)             | 1                       | 1                     | 1                      | 1                     | 2                         | 1                  | 1                  | 0              | 8               |
| Fischer (2018)          | 1                       | 1                     | 1                      | 0                     | 2                         | 1                  | 1                  | 1              | 8               |
| Vercambre (2009)        | 1                       | 1                     | 1                      | 0                     | 2                         | 0                  | 1                  | 1              | 7               |
| Rahman (2007)           | 1                       | 1                     | 1                      | 0                     | 1                         | 1                  | 0                  | 0              | 5               |
| Katsiardanis (2013)     | 0                       | 1                     | 1                      | 1                     | 1                         | 1                  | 0                  | 0              | 5               |
| Ritchie (2010)          | 0                       | 1                     | 0                      | 1                     | 0                         | 0                  | 0                  | 1              | 3               |
| Chuang (2019)           | 0                       | 1                     | 1                      | 1                     | 1                         | 1                  | 0                  | 0              | 5               |
| Trichopoulou (2015)     | 0                       | 1                     | 1                      | 0                     | 1                         | 1                  | 1                  | 0              | 5               |
| Albanese (2009)         | 1                       | 1                     | 1                      | 1                     | 2                         | 1                  | 0                  | 0              | 7               |
| Wang (2010)             | 0                       | 1                     | 0                      | 1                     | 1                         | 1                  | 1                  | 0              | 5               |
| Ylilauri (2022)         | 0                       | 1                     | 1                      | 1                     | 0                         | 1                  | 1                  | 0              | 5               |

---

Supplementary files

---

|                  |   |   |   |   |   |   |   |   |   |
|------------------|---|---|---|---|---|---|---|---|---|
| Franca (2018)    | 0 | 1 | 1 | 0 | 1 | 1 | 1 | 0 | 5 |
| Tsurumaki (2019) | 1 | 1 | 1 | 1 | 1 | 1 | 1 | 1 | 8 |
| Jiang (2018)     | 1 | 1 | 1 | 1 | 2 | 1 | 1 | 1 | 9 |
| Zhang (2021)     | 1 | 1 | 1 | 1 | 2 | 1 | 1 | 1 | 9 |
| Ngabirano (2019) | 0 | 1 | 1 | 1 | 2 | 1 | 1 | 1 | 8 |

---

**Supplementary Table 7.** Data extracted for dose-response analysis.

| Study      | Author    | logRR    | Variance | Cat | Cases | Per years | Dose   | Se       |
|------------|-----------|----------|----------|-----|-------|-----------|--------|----------|
| Fish       |           |          |          |     |       |           |        |          |
| 1          | Roberts   | 0        | 0        | 0   | 58    | 353       | 8.7    | 0        |
| 1          | Roberts   | 0.0086   | 0.007529 | 1   | 58    | 354       | 15     | 0.086767 |
| 1          | Roberts   | -0.00436 | 0.008273 | 2   | 47    | 363       | 21.3   | 0.090956 |
| 2          | Ylilauri  | 0        | 0        | 0   | 78    | 623       | 0      | 0        |
| 2          | Ylilauri  | 0.049218 | 0.004493 | 1   | 94    | 625       | 18     | 0.067032 |
| 2          | Ylilauri  | -0.08619 | 0.005184 | 2   | 72    | 624       | 48     | 0.071997 |
| 2          | Ylilauri  | 0.033424 | 0.004733 | 3   | 93    | 625       | 102    | 0.068799 |
| 3          | Tsurumaki | 0        | 0        | 0   | 336   | 15536     | 17.05  | 0        |
| 3          | Tsurumaki | -0.04576 | 0.002018 | 1   | 132   | 7913      | 43.75  | 0.044921 |
| 3          | Tsurumaki | -0.07058 | 0.001139 | 2   | 344   | 21452     | 74.9   | 0.033753 |
| 3          | Tsurumaki | -0.07572 | 0.001415 | 3   | 306   | 20029     | 96.4   | 0.037611 |
| 4          | Jiang     | 0        | 0        | 0   | 652   | 4237      | 28.46  | 0        |
| 4          | Jiang     | -0.04096 | 0.000845 | 1   | 605   | 4237      | 45.77  | 0.029067 |
| 4          | Jiang     | -0.06048 | 0.000775 | 2   | 593   | 4237      | 61.11  | 0.027843 |
| 4          | Jiang     | -0.05061 | 0.000883 | 3   | 593   | 4237      | 83.95  | 0.029721 |
| Total meat |           |          |          |     |       |           |        |          |
| 1          | Roberts   | 0        | 0        | 0   | 54    | 357       | 41.6   | 0        |
| 1          | Roberts   | 0.064458 | 0.007676 | 1   | 59    | 353       | 107.75 | 0.087611 |
| 1          | Roberts   | -0.05061 | 0.00856  | 2   | 50    | 360       | 132.3  | 0.092522 |
| 2          | Ylilauri  | 0        | 0        | 0   | 89    | 624       | 77     | 0        |
| 2          | Ylilauri  | 0.0086   | 0.004564 | 1   | 88    | 625       | 128    | 0.067556 |
| 2          | Ylilauri  | 0.012837 | 0.004688 | 2   | 86    | 623       | 174    | 0.068471 |
| 2          | Ylilauri  | 0.004321 | 0.006386 | 3   | 74    | 624       | 261    | 0.079914 |
| 3          | Zhang     | 0        | 0        | 0   | 146   | 77261     | 63     | 0        |
| 3          | Zhang     | 0.053078 | 0.002278 | 1   | 188   | 90065     | 86     | 0.047726 |
| 3          | Zhang     | 0.068186 | 0.001881 | 2   | 322   | 162570    | 96     | 0.043372 |
| 3          | Zhang     | 0.143015 | 0.00196  | 3   | 316   | 143519    | 113    | 0.044271 |
| 4          | Zhang     | 0        | 0        | 0   | 459   | 77261     | 63     | 0        |
| 4          | Zhang     | -0.02228 | 0.000775 | 1   | 509   | 90065     | 86     | 0.027843 |
| 4          | Zhang     | -0.01773 | 0.000637 | 2   | 875   | 162570    | 96     | 0.025236 |
| 4          | Zhang     | 0.082785 | 0.000652 | 3   | 959   | 143519    | 113    | 0.02554  |
| Red meat   |           |          |          |     |       |           |        |          |
| 1          | Jiang     | 0        | 0        | 0   | 610   | 4237      | 11.81  | 0        |
| 1          | Jiang     | -0.01323 | 0.000893 | 1   | 585   | 4237      | 23.75  | 0.029876 |
| 1          | Jiang     | 0.049218 | 0.000927 | 2   | 636   | 4237      | 33.06  | 0.03045  |

Supplementary files

|   |          |          |          |   |     |        |       |          |
|---|----------|----------|----------|---|-----|--------|-------|----------|
| 1 | Jiang    | 0.064458 | 0.000879 | 3 | 612 | 4237   | 48.61 | 0.029656 |
| 2 | Ylilauri | 0        | 0        | 0 | 91  | 624    | 65    | 0        |
| 2 | Ylilauri | -0.00877 | 0.004307 | 1 | 88  | 625    | 113   | 0.065625 |
| 2 | Ylilauri | -0.01323 | 0.004605 | 2 | 85  | 624    | 156   | 0.06786  |
| 2 | Ylilauri | -0.03152 | 0.006028 | 3 | 73  | 624    | 230   | 0.077642 |
| 3 | Zhang    | 0        | 0        | 0 | 369 | 57433  | 24    | 0        |
| 3 | Zhang    | -0.06048 | 0.000775 | 1 | 812 | 153797 | 35    | 0.027843 |
| 3 | Zhang    | -0.10237 | 0.000775 | 2 | 722 | 138648 | 44    | 0.027843 |
| 3 | Zhang    | -0.01773 | 0.000833 | 3 | 791 | 110441 | 54    | 0.028864 |
| 4 | Zhang    | 0        | 0        | 0 | 146 | 57433  | 24    | 0        |
| 4 | Zhang    | -0.10237 | 0.002122 | 1 | 284 | 153797 | 35    | 0.046069 |
| 4 | Zhang    | -0.14267 | 0.003509 | 2 | 253 | 138648 | 44    | 0.059237 |
| 4 | Zhang    | -0.09691 | 0.002173 | 3 | 255 | 110441 | 54    | 0.046613 |

Poultry

|   |       |          |          |   |      |        |       |          |
|---|-------|----------|----------|---|------|--------|-------|----------|
| 1 | Jiang | 0        | 0        | 0 | 645  | 4237   | 6     | 0        |
| 1 | Jiang | -0.02687 | 0.000792 | 1 | 642  | 4237   | 15.22 | 0.028139 |
| 1 | Jiang | -0.04096 | 0.000928 | 2 | 602  | 4237   | 22.68 | 0.030461 |
| 1 | Jiang | -0.05061 | 0.000883 | 3 | 554  | 4237   | 37.18 | 0.029721 |
| 2 | Zhang | 0        | 0        | 0 | 425  | 53001  | 19    | 0        |
| 2 | Zhang | -0.06048 | 0.000714 | 1 | 1063 | 177074 | 28    | 0.026718 |
| 2 | Zhang | -0.05552 | 0.000625 | 2 | 1190 | 227200 | 39    | 0.025002 |
| 2 | Zhang | 0.017033 | 0.003456 | 3 | 65   | 11142  | 61    | 0.058788 |
| 3 | Zhang | 0        | 0        | 0 | 46   | 53001  | 19    | 0        |
| 3 | Zhang | -0.08619 | 0.001969 | 1 | 143  | 177074 | 28    | 0.044369 |
| 3 | Zhang | -0.03621 | 0.001761 | 2 | 364  | 227200 | 39    | 0.041967 |
| 3 | Zhang | 0.041393 | 0.010762 | 3 | 433  | 11142  | 61    | 0.103741 |

Processed meat

|   |       |          |          |   |     |        |     |          |
|---|-------|----------|----------|---|-----|--------|-----|----------|
| 1 | Jiang | 0        | 0        | 0 | 95  | 637    | 10  | 0        |
| 1 | Jiang | 0.025306 | 0.004424 | 1 | 91  | 608    | 40  | 0.066514 |
| 1 | Jiang | 0.045323 | 0.004761 | 2 | 83  | 626    | 76  | 0.069003 |
| 1 | Jiang | 0.049218 | 0.00579  | 3 | 78  | 626    | 139 | 0.07609  |
| 2 | Zhang | 0        | 0        | 0 | 724 | 150758 | 16  | 0        |
| 2 | Zhang | 0.053078 | 0.000508 | 1 | 796 | 144076 | 22  | 0.022528 |
| 2 | Zhang | 0.136721 | 0.000509 | 2 | 914 | 133365 | 28  | 0.022557 |
| 2 | Zhang | 0.222716 | 0.001415 | 3 | 170 | 19331  | 32  | 0.037614 |
| 3 | Zhang | 0        | 0        | 0 | 263 | 150758 | 16  | 0        |
| 3 | Zhang | 0.029384 | 0.001456 | 1 | 256 | 144076 | 22  | 0.038153 |
| 3 | Zhang | 0.193125 | 0.001462 | 2 | 325 | 133365 | 28  | 0.03824  |

# Supplementary files

|   |       |          |          |   |    |       |    |          |
|---|-------|----------|----------|---|----|-------|----|----------|
| 3 | Zhang | 0.227887 | 0.004942 | 3 | 49 | 19331 | 32 | 0.070302 |
|---|-------|----------|----------|---|----|-------|----|----------|

NOTE: Cat: categories; Person year: no. of participants multiplied by follow-up years; Cases: no. of cases multiplied by follow-up years; the unit of dose: g/day.

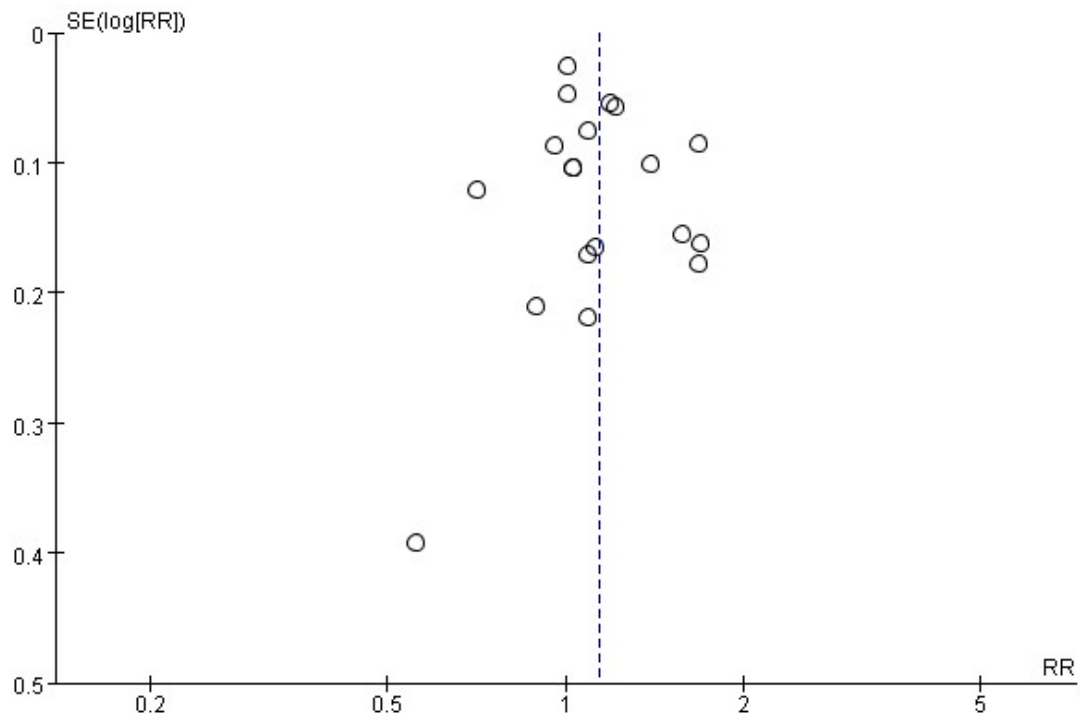

**Supplementary Figure 1.** Funnel plots of total meat intakes and neurodegenerative cognitive disorders risk in the highest *versus* lowest analysis.

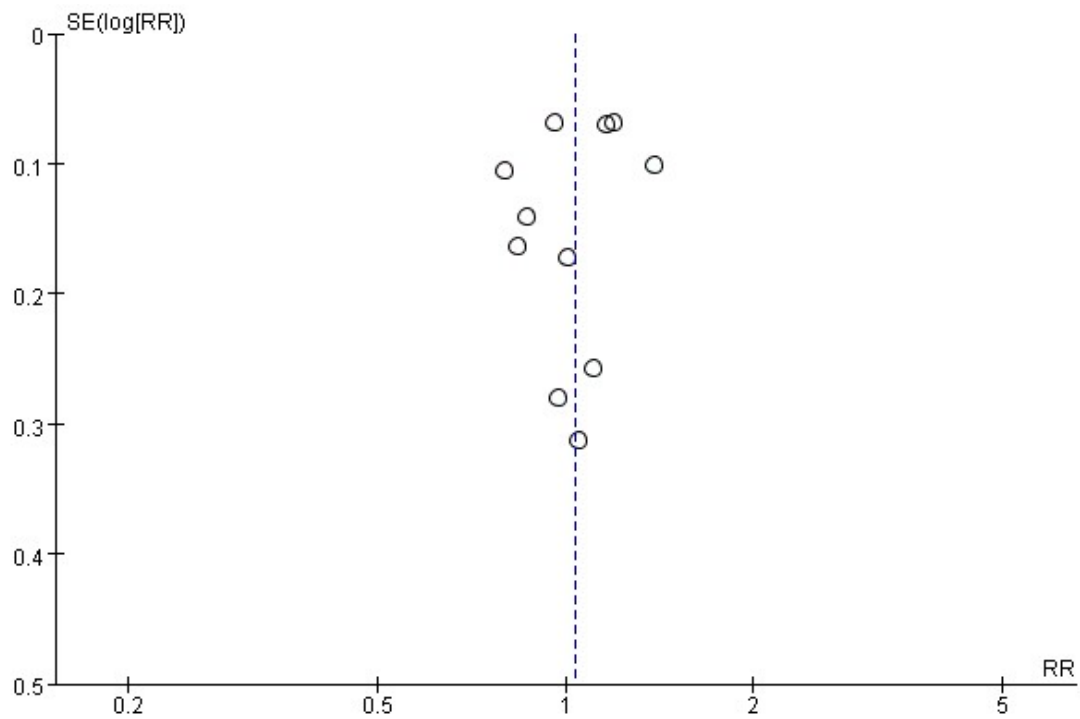

**Supplementary Figure 2.** Funnel plots of read meat intakes and neurodegenerative cognitive disorders risk in the highest *versus* lowest analysis.

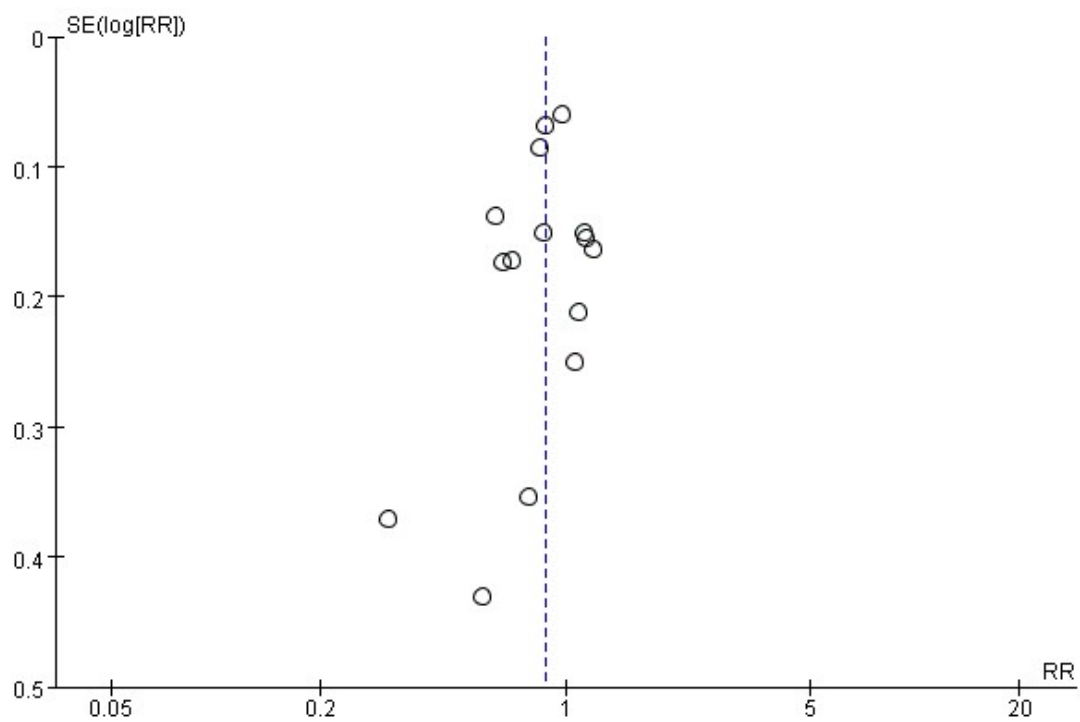

**Supplementary Figure 3.** Funnel plots of fish intakes and neurodegenerative cognitive disorders risk in the highest *versus* lowest analysis.



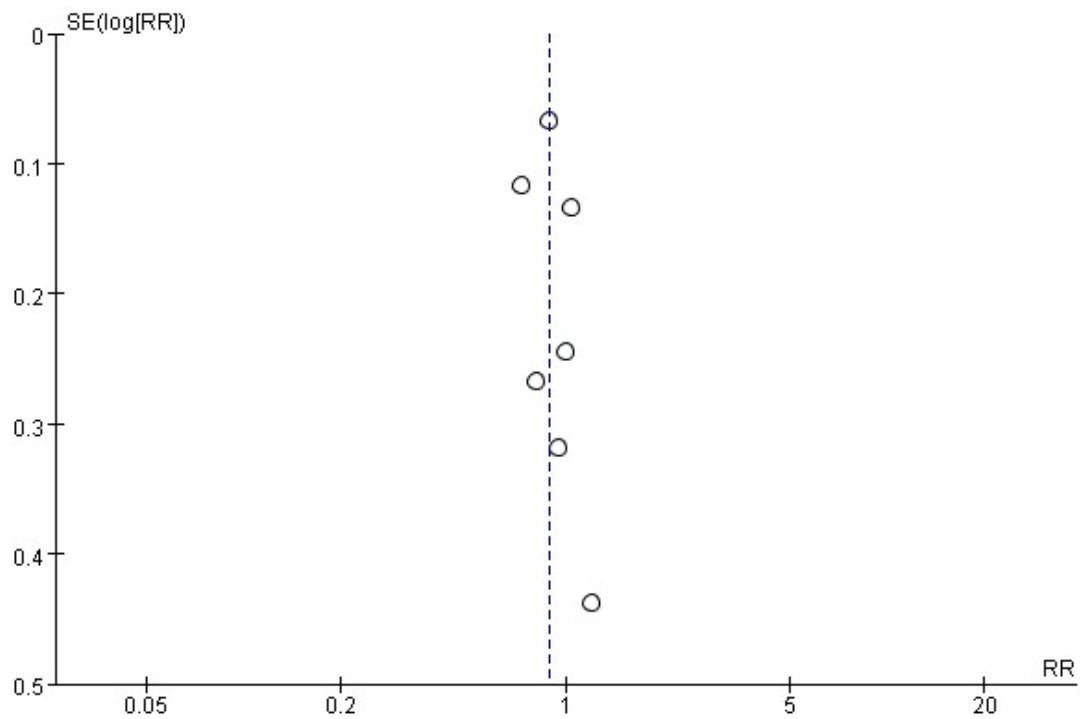

**Supplementary Figure 4.** Funnel plots of poultry intakes and neurodegenerative cognitive disorders risk in the highest *versus* lowest analysis.

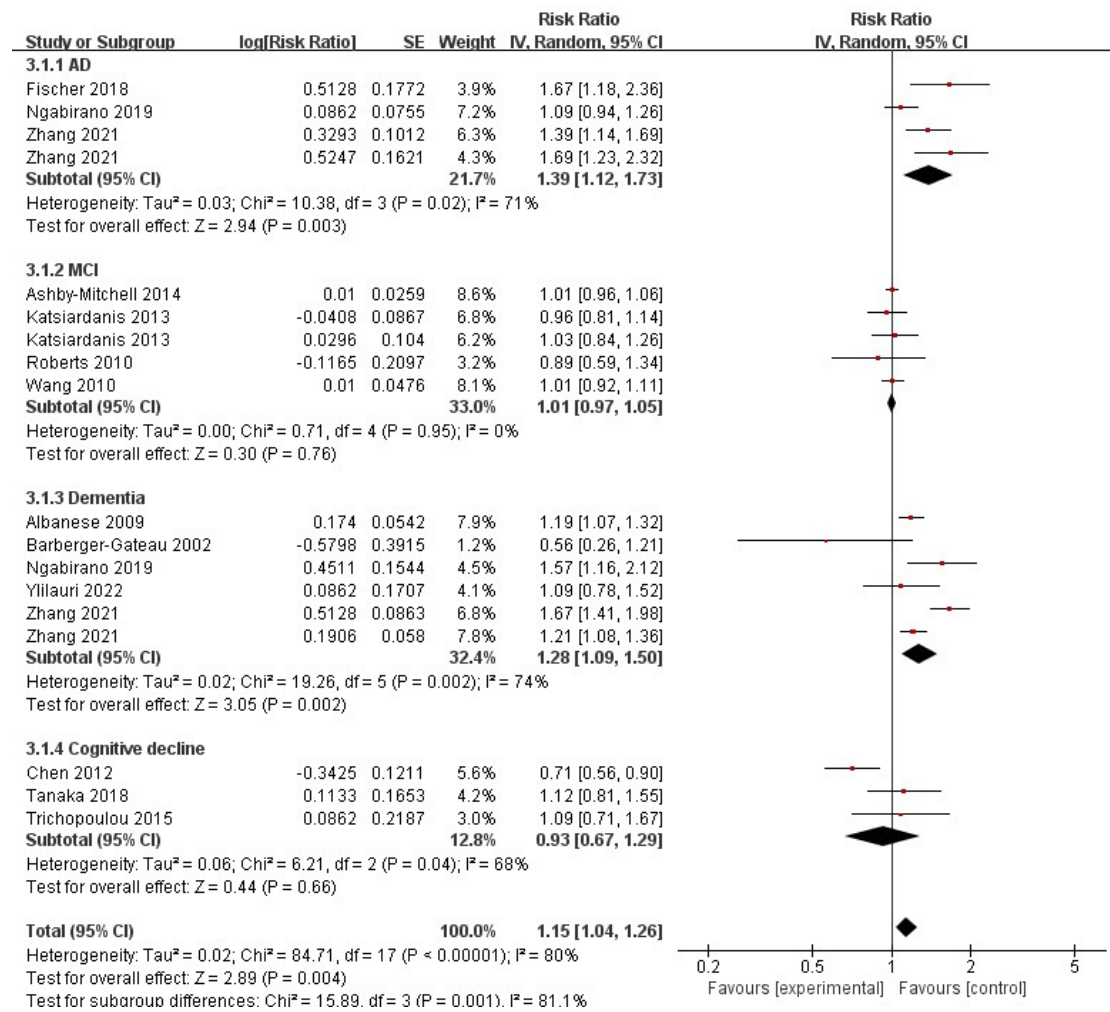

**Supplementary Figure 5.** Subgroup analysis (stratified by different types of adverse cognitive outcome) for total meat intakes and risk of neurodegenerative cognitive disorders.

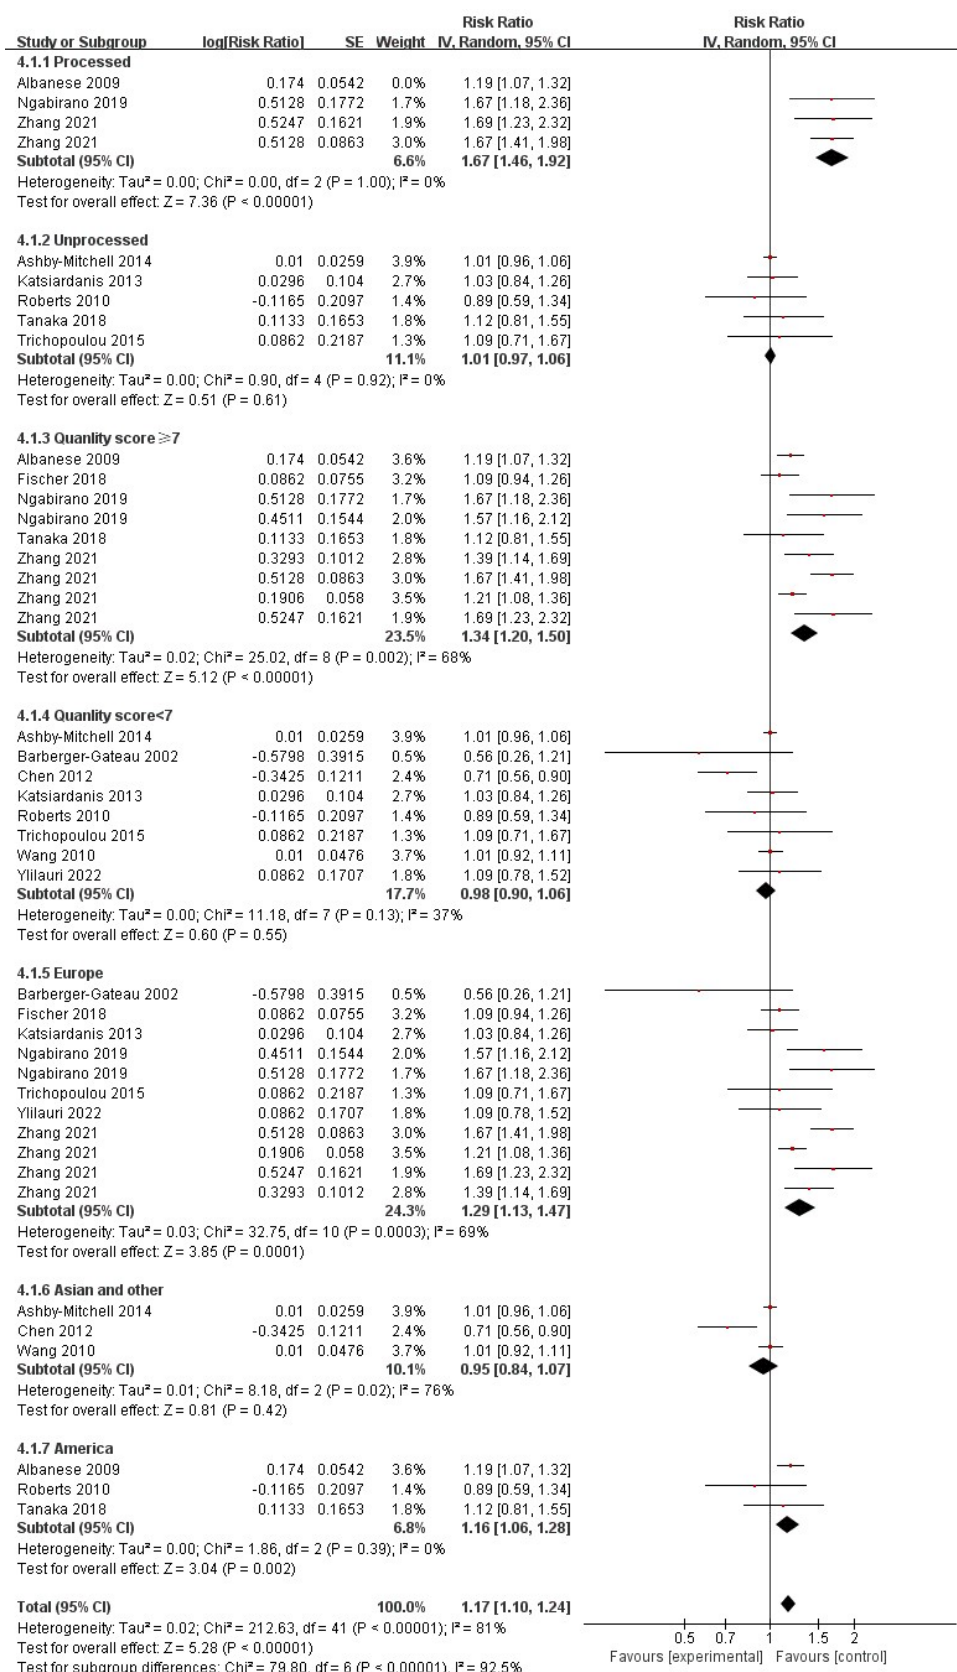

**Supplementary Figure 6.** Subgroup analysis (stratified by processing method of meat, location and quality score of studies) for total meat intakes and risk of neurodegenerative cognitive disorders.

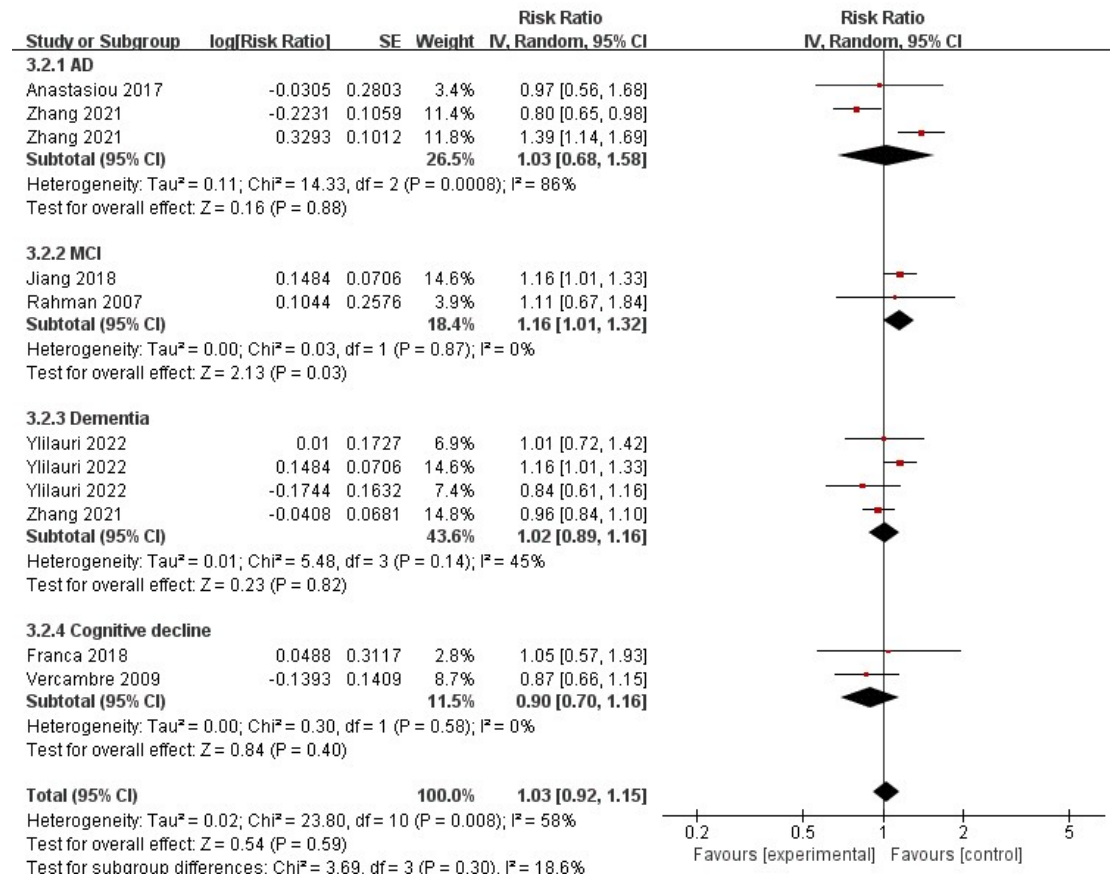

**Supplementary Figure 7.** Subgroup analysis (stratified by different types of adverse cognitive outcome) for read meat intakes and risk of neurodegenerative cognitive disorders.

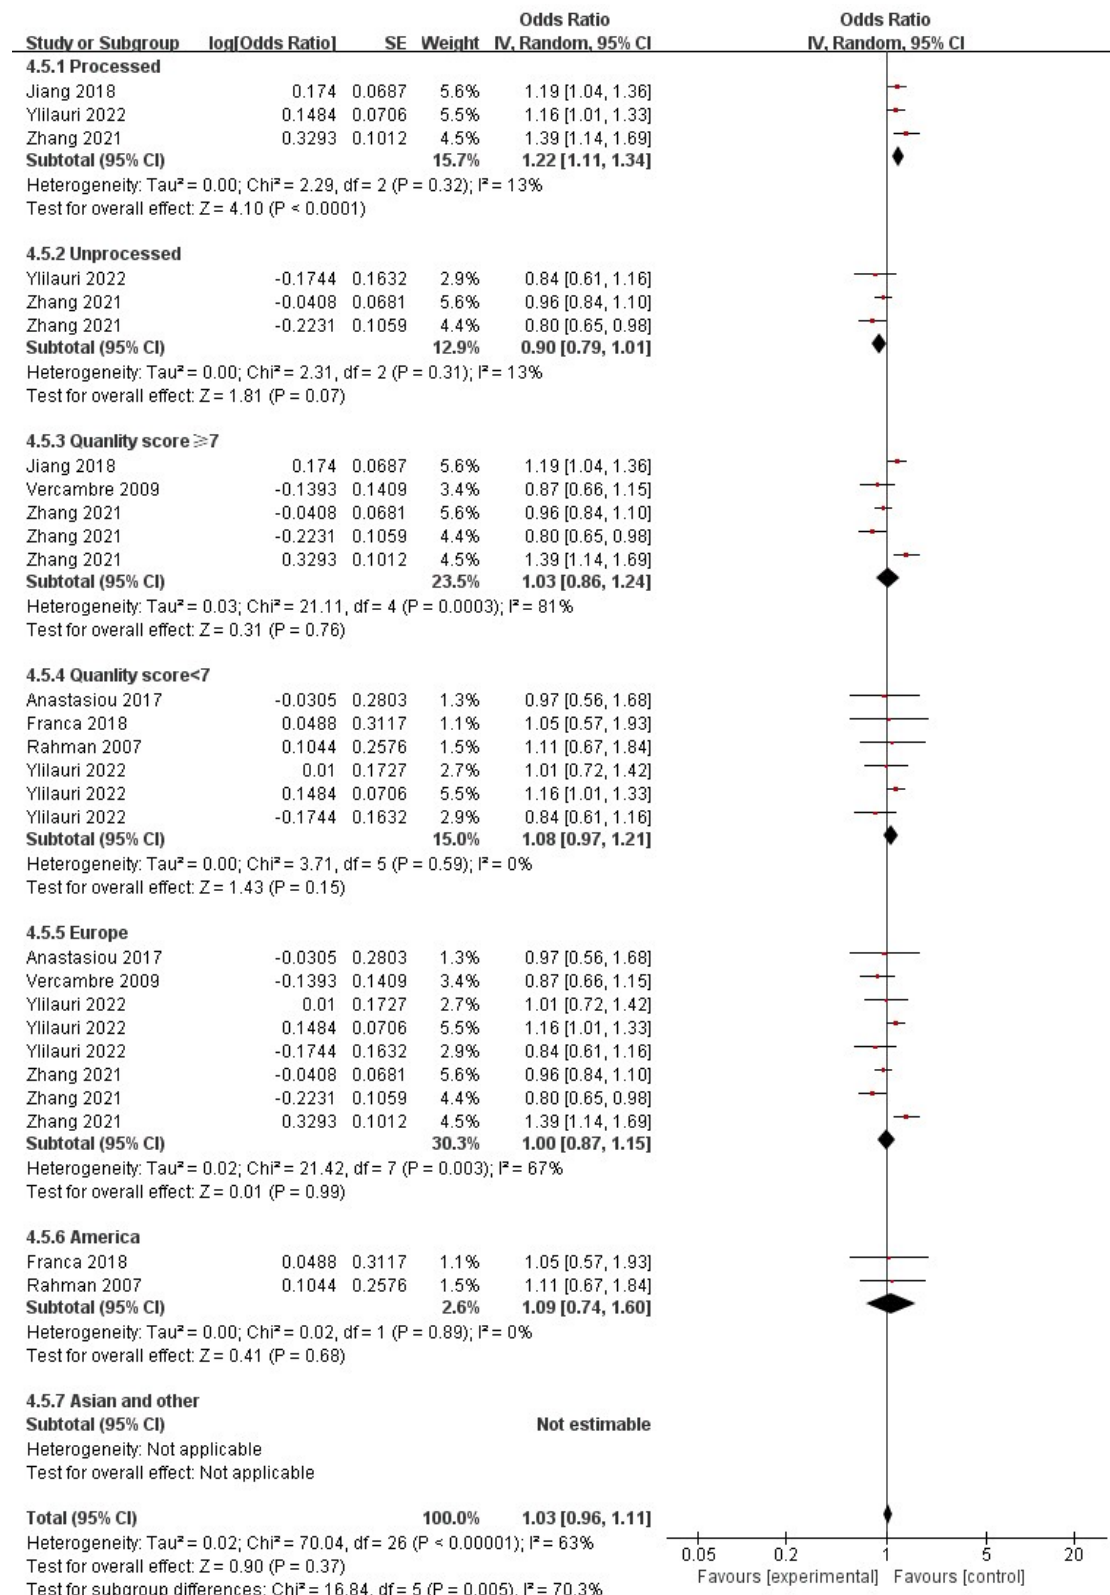

**Supplementary Figure 8.** Subgroup analysis (stratified by processing method of meat, location and quality score of studies) for read meat intakes and risk of neurodegenerative cognitive disorders.

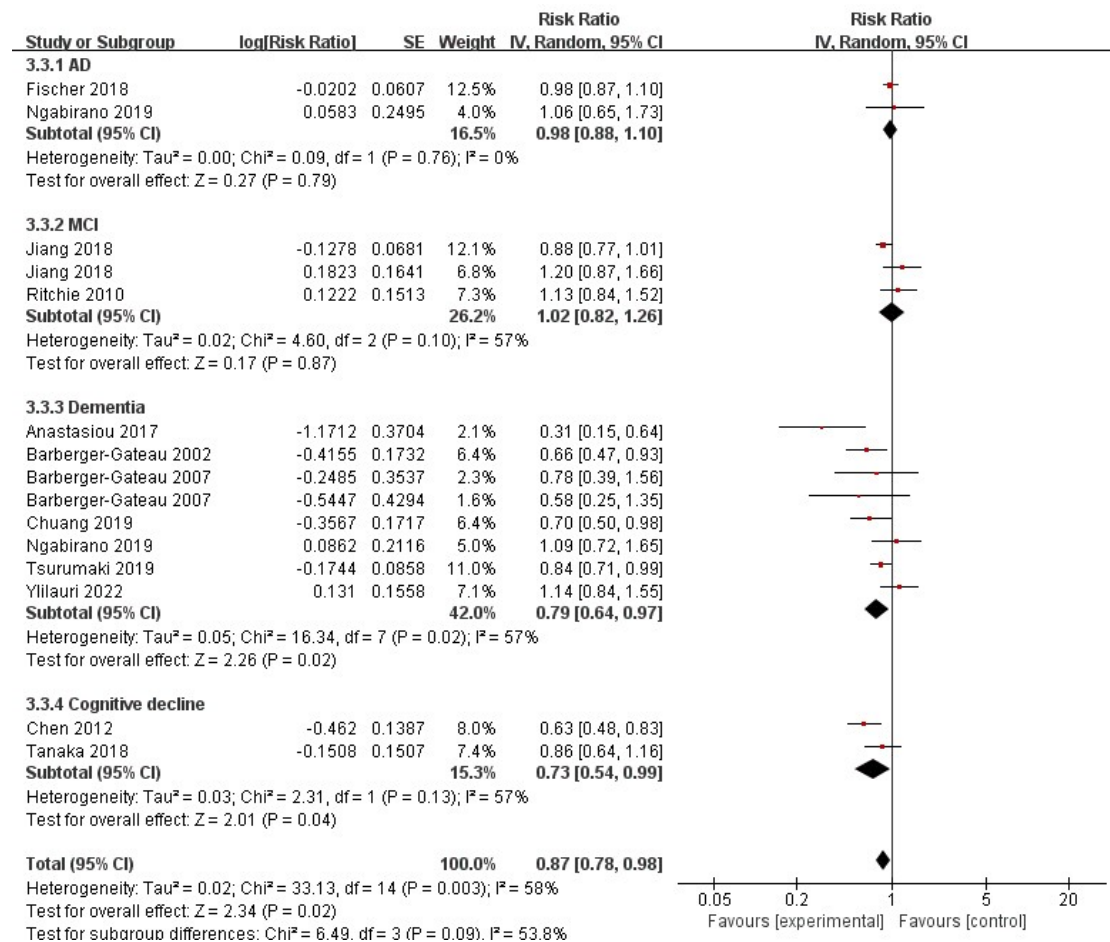

**Supplementary Figure 9.** Subgroup analysis (stratified by different types of adverse cognitive outcome) for fish intakes and risk of neurodegenerative cognitive disorders.



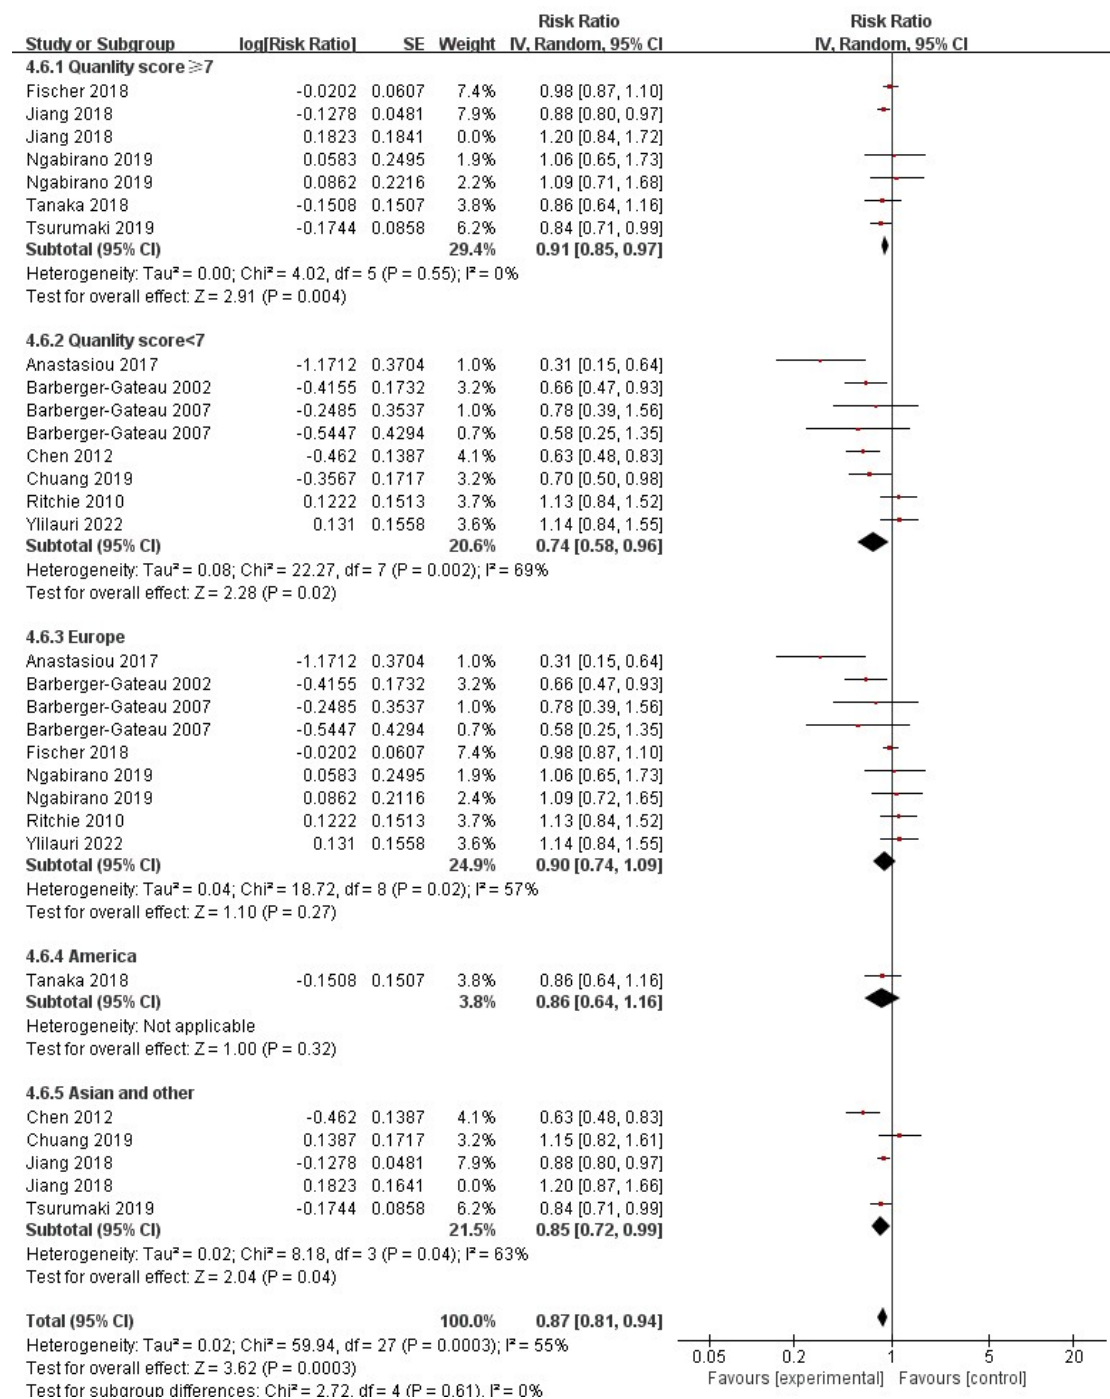

**Supplementary Figure 10.** Subgroup analysis (stratified by processing method of meat, location and quality score of studies) for fish intakes and risk of neurodegenerative cognitive disorders.
